# Supplementary material for: Nutrient intake and brain biomarkers of Alzheimer's disease in at-risk cognitively normal individuals: a cross-sectional neuroimaging pilot study
Source: HighWire-hosted journal article supplement (doi:10.1136/bmjopen-2014-004850), 2014-06-01
Supplement: bmjopen-2014-004850supp.pdf [file bmjopen-2014-004850supp.pdf]

**eFigure 1.** Associations between brain glucose metabolism in AD-regions, folate,  $\beta$ -carotene and saturated fats in women (n=33) vs. men (n=16)

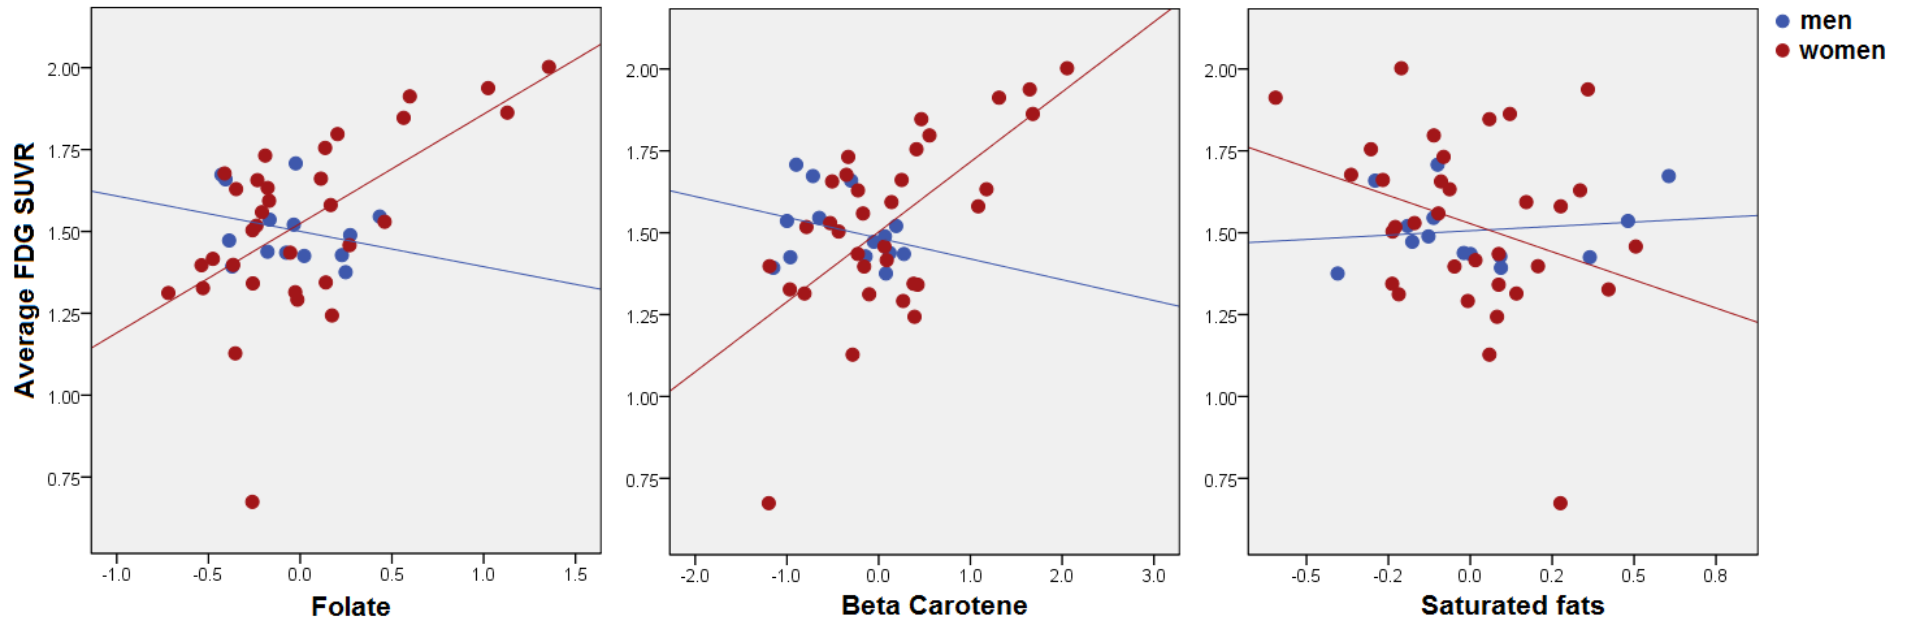

Nutrient values are age and caloric intake-adjusted residuals. FDG values are regional standardized uptake value ratios to pons activity [SUVR, unitless]. Corresponding  $p$  values are found in Table 2

**eFigure 2.** Associations between brain glucose metabolism in AD-regions and  $\beta$ -carotene as a function of gender  $\times$  *APOE*  $\times$  family history of AD (FH)

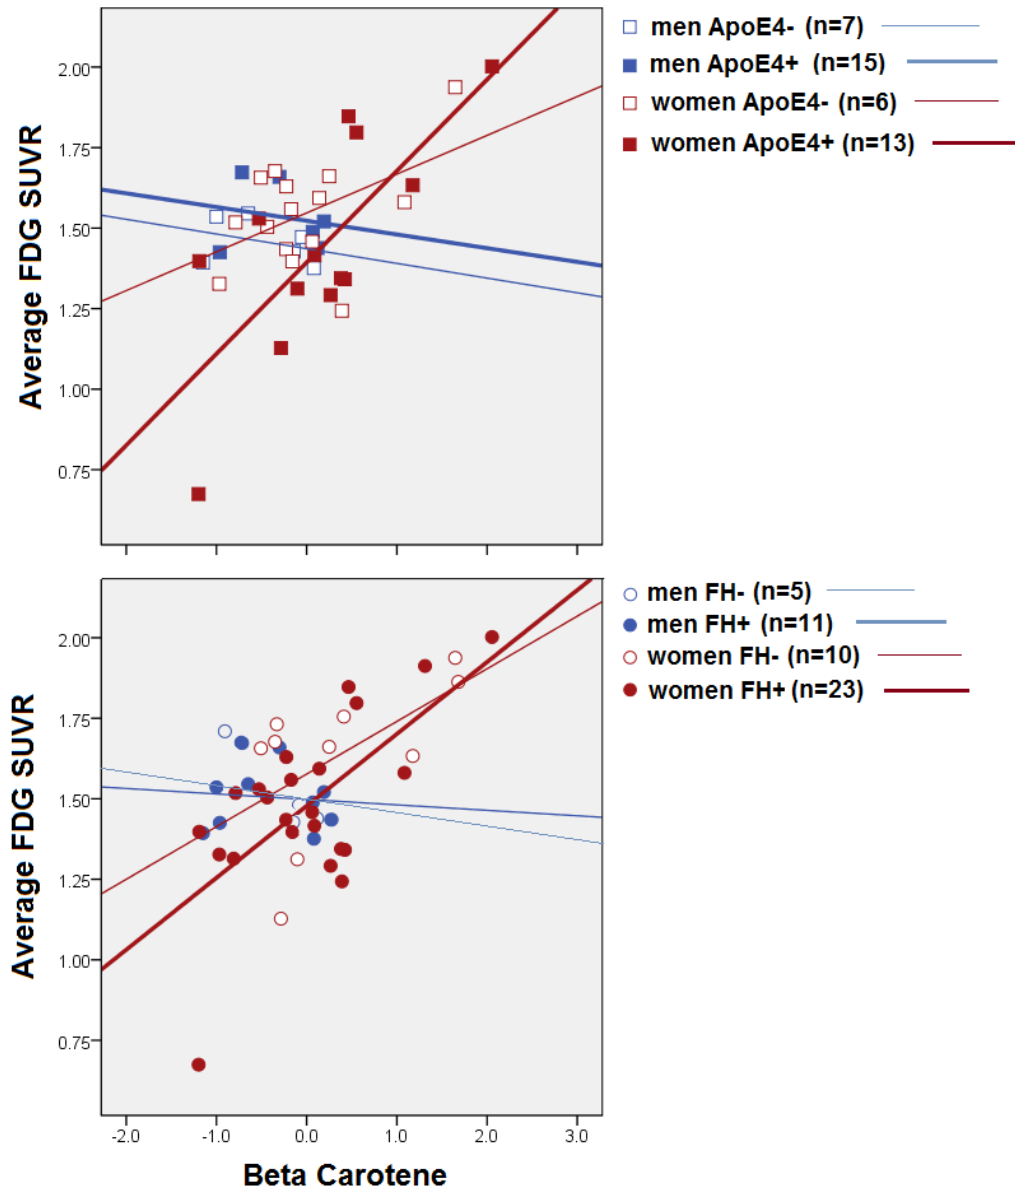

$\beta$ -carotene values are age and caloric intake-adjusted residuals. FDG values are regional standardized uptake value ratios to pons activity [SUVR, unitless]. Corresponding *p* values are found in Table 2. Abbreviations: *APOE*  $\epsilon$ 4 allele carriers (*APOE*4+), *APOE*  $\epsilon$ 4 allele non-carriers (*APOE*4-), positive family history of late-onset AD (FH+), negative family history of late-onset AD (FH-)

**Figure 3.** Associations of PiB retention in AD-regions with vitamin B12, vitamin D and omega3-PUFA (EPA) as a function of gender, family history of late-onset AD (FH) and *APOE* status

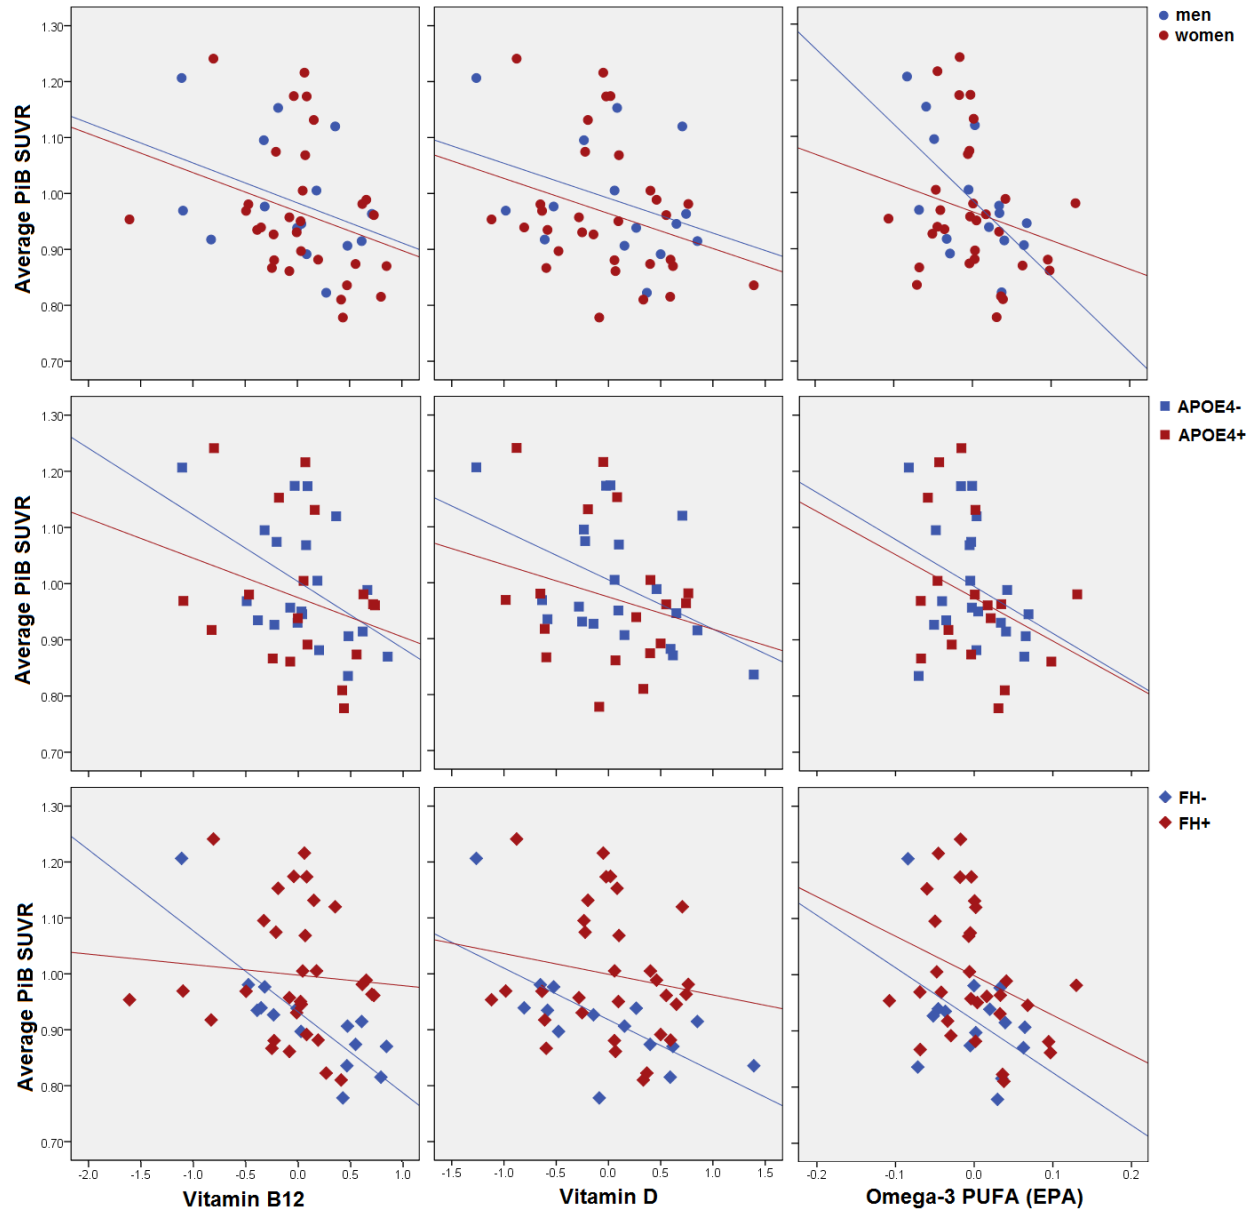

Nutrient values are age and caloric intake-adjusted residuals. PiB values are regional standardized uptake value ratios to cerebellar uptake [SUVR, unitless]. There are no significant nutrient×group interaction effects at  $p < 0.05$ . Abbreviations: *APOE*  $\epsilon 4$  allele carriers (*APOE*4+), *APOE*  $\epsilon 4$  allele non-carriers (*APOE*4-), positive family history of late-onset AD (FH+), negative family history of late-onset AD (FH-).
